# Supplementary material for: Conductive gradient hydrogels allow spatial control of adult stem cell fate
Source: Royal Society of Chemistry journal article supplement (doi:10.1039/d3tb02269b), 2024-01-01
Supplement: d3tb02269b1.pdf [file d3tb02269b1.pdf]

## Supplementary Information

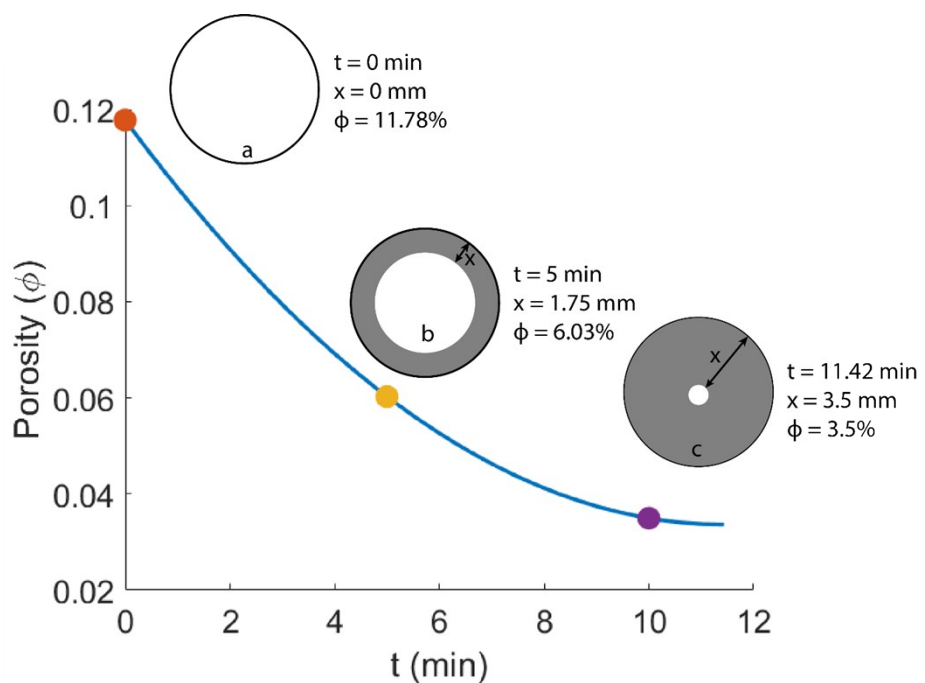

Figure S1. Numerical solution of average gel porosity versus time immersed in polypyrrole solution. The cross section of gradient gels at three different times (a, b, c) was depicted next to the curve.

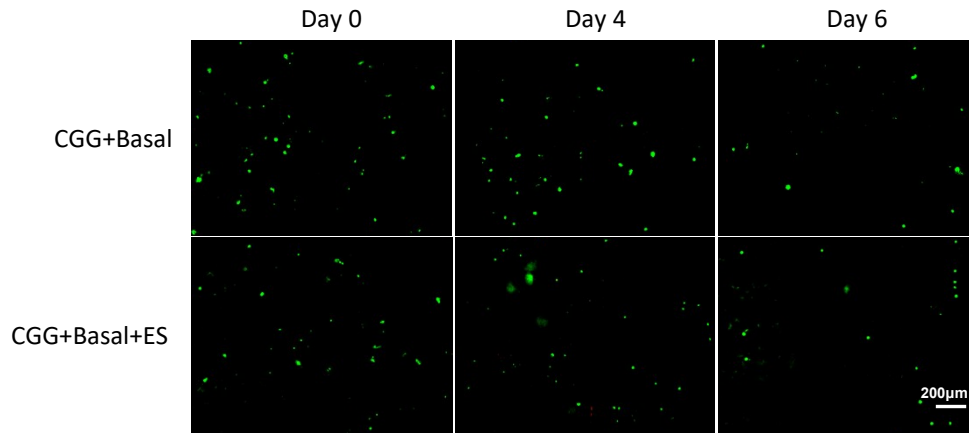

Figure S2. Live/dead assay showing that unstimulated (CGG+Basal) and stimulated hMSC-seeded CGG (CGG+Basal+ES) were highly viable (green: alive; red: dead)

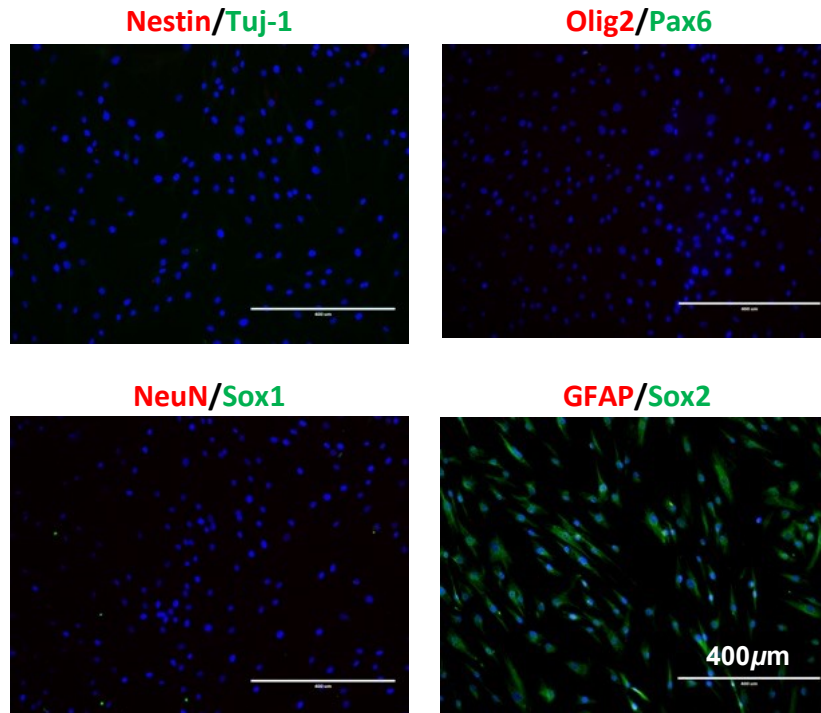

Figure S3. hMSCs cultured on tissue culture plastics (TCP) in basal medium as the negative control. This figure showing that hMSCs do not differentiate into the neural lineage without external induction for differentiation.

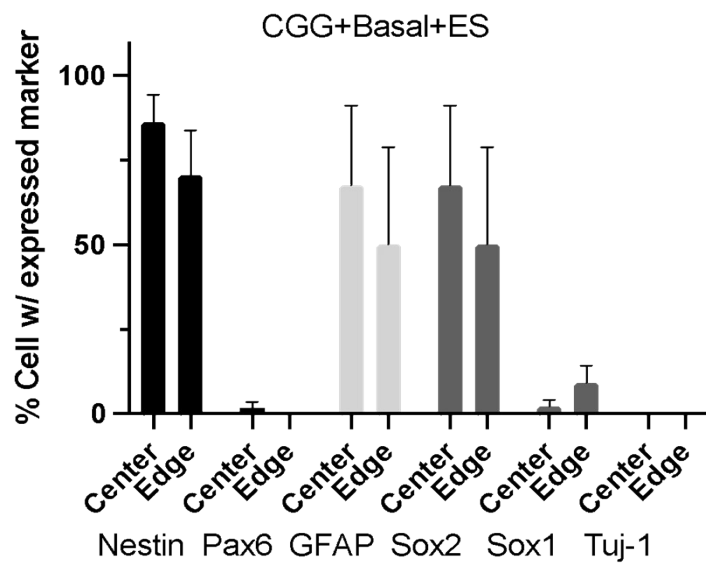

Figure S4. No significant difference in the expression of neural lineage makers (Nestin, Pax6, GFAP, Sox2, and Sox1) between the center and edge of the stimulated CGGs.
